# Supplementary material for: Apoptosis Governs the Elimination of Schistosoma japonicum from the Non-Permissive Host Microtus fortis
Source: PLoS One. 2011 Jun 22;6(6):e21109. doi: 10.1371/journal.pone.0021109 (PMC3120819; doi:10.1371/journal.pone.0021109)
Supplement: Table S1 — A full list of genes, including systematic name, Gene ID and protein homology, up regulated in schistosomula from M.fortis 2 Fold change refers to expression relative to those of schistosomula from BALB/c mice. (XLS) [file pone.0021109.s001.xls]

## Sheet: Sheet1
Table S1 A full list of genes, including systematic name, Gene ID and protein homology, up regulated in schistosomula from M.fortis. 2 Fold change refers to expression relative to those of schistosomula from BALB/c mice.
Systematic Name	Fold ratio	protein homology	Gene ID
Contig08554	88.1759	E3 ubiquitin-protein ligase ubr11 OS=Schizosaccharomyces pombe GN=ubr11 PE=2 SV=1	SJCHGC08294
Contig12492	44.3476	Granulins OS=Homo sapiens GN=GRN PE=1 SV=2	SJCHGC07011
Contig01126	41.7156	NIL	SJCHGC04401
Contig12604	20.6372	Translocase of chloroplast 33, chloroplastic OS=Arabidopsis thaliana GN=TOC33 PE=1 SV=1	SJCHGC01950
Contig09693	18.2007	NIL	SJCHGC01002
Contig12392	14.7828	Cell surface receptor daf-4 OS=Caenorhabditis elegans GN=daf-4 PE=1 SV=2	SJCHGC08008
Contig12799	9.97435	Probable serine/threonine-protein kinase roco5 OS=Dictyostelium discoideum GN=roco5 PE=3 SV=1	SJCHGC00299
Contig00716	9.45453	Pericentriolar material 1 protein OS=Mus musculus GN=Pcm1 PE=1 SV=1	SJCHGC11428
Contig08040	8.49291	NAD(P)H-quinone oxidoreductase chain 4, chloroplastic OS=Arabidopsis thaliana GN=ndhD PE=2 SV=3	SJCHGC04580
Contig00449	8.17236	Protein TAR1 OS=Kluyveromyces lactis GN=TAR1-A PE=4 SV=2	SJCHGC04728
Contig01305	8.00966	Dynein heavy chain (Fragment) OS=Oncorhynchus mykiss PE=2 SV=1	SJCHGC07942
Contig07698	7.71997	Zinc finger RNA-binding protein OS=Danio rerio GN=zfr PE=2 SV=2	SJCHGC09208
Contig14121	7.45552	Uncharacterized protein DDB_G0281497 OS=Dictyostelium discoideum GN=DDB_G0281497 PE=4 SV=1	SJCHGC04932
Contig11651	6.88815	Tropomyosin OS=Clonorchis sinensis PE=2 SV=1	SJCHGC07141
Contig12273	6.80148	U3 small nucleolar RNA-associated protein 4 OS=Saccharomyces cerevisiae GN=UTP4 PE=1 SV=1	SJCHGC08142
Contig13194	6.70869	Putative BTB/POZ domain-containing protein L67 OS=Acanthamoeba polyphaga mimivirus GN=MIMI_L67 PE=3 SV=1	SJCHGC09946
Contig06456	5.9234	ATP-dependent RNA helicase DBP10 OS=Ajellomyces capsulata (strain NAm1 / WU24) GN=DBP10 PE=3 SV=1	SJCHGC10846
Contig09076	5.0466	Probable serine/threonine-protein kinase DDB_G0282963 OS=Dictyostelium discoideum GN=DDB_G0282963 PE=3 SV=1	SJCHGC13606
Contig12310	4.98914	Diphthamide biosynthesis protein 2 OS=Dictyostelium discoideum GN=dph2 PE=3 SV=1	SJCHGC02939
Contig06389	4.94992	Clathrin heavy chain 1 OS=Mus musculus GN=Cltc PE=1 SV=3	SJCHGC12051
Contig08332	4.77267	NIL	SJCHGC10393
Contig09578	4.66985	WUSCHEL-related homeobox 3 OS=Arabidopsis thaliana GN=WOX3 PE=2 SV=1	SJCHGC13608
Contig07412	4.45071	Uncharacterized aarF domain-containing protein kinase 5 OS=Homo sapiens GN=ADCK5 PE=2 SV=2	SJCHGC13010
Contig07808	4.43683	Transmembrane protein 49 OS=Xenopus tropicalis GN=tmem49 PE=2 SV=1	SJCHGC10713
Contig03037	4.20862	Protein KRI1 homolog OS=Mus musculus GN=Kri1 PE=1 SV=2	SJCHGC02936
Contig08197	4.07056	Ribosomal operon-associated A protein OS=Astasia longa GN=roaA PE=3 SV=1	SJCHGC01219
Contig03467	3.94528	Arginine kinase OS=Liolophura japonica PE=2 SV=1	SJCHGC06930
Contig02455	3.83283	Cartilage oligomeric matrix protein OS=Homo sapiens GN=COMP PE=1 SV=2	SJCHGC13681
Contig06876	3.68313	Mediator of RNA polymerase II transcription subunit 12 OS=Caenorhabditis briggsae GN=dpy-22 PE=3 SV=1	SJCHGC15553
Contig08500	3.60343	NIL	SJCHGC14426
Contig05708	3.51126	Williams-Beuren syndrome chromosomal region 14 protein homolog OS=Mus musculus GN=Mlxipl PE=1 SV=1	SJCHGC10875
Contig10643	3.29721	NADH-ubiquinone oxidoreductase chain 4 OS=Apis mellifera ligustica GN=ND4 PE=3 SV=1	SJCHGC03271
Contig08630	3.11686	ATP-citrate synthase subunit 1 OS=Sordaria macrospora GN=ACL1 PE=3 SV=1	SJCHGC09807
Contig06361	2.92456	Phosphatidylinositide phosphatase SAC2 OS=Mus musculus GN=Inpp5f PE=1 SV=1	SJCHGC15782
Contig00498	2.9189	Paxillin OS=Pongo abelii GN=PXN PE=2 SV=1	SJCHGC08648
Contig11776	2.79961	Sulfide:quinone oxidoreductase, mitochondrial OS=Dictyostelium discoideum GN=sqrdl PE=3 SV=1	SJCHGC04610
Contig13690	2.73974	Protein psiJ OS=Dictyostelium discoideum GN=psiJ PE=3 SV=1	SJCHGC11491
Contig09660	2.73063	Sodium/hydrogen exchanger 7 OS=Arabidopsis thaliana GN=NHX7 PE=1 SV=1	SJCHGC15829
Contig03162	2.68529	Regulating synaptic membrane exocytosis protein 2 OS=Rattus norvegicus GN=Rims2 PE=1 SV=1	SJCHGC13774
Contig03274	2.66842	Protein transport protein Sec61 subunit alpha isoform B OS=Oncorhynchus mykiss GN=sec61ab PE=2 SV=3	SJCHGC01487
Contig07003	2.63604	Janus kinase and microtubule-interacting protein 1 OS=Rattus norvegicus GN=Jakmip1 PE=1 SV=1	SJCHGC07980
Contig07541	2.53862	Annexin A11 OS=Bos taurus GN=ANXA11 PE=1 SV=1	SJCHGC10409
Contig13649	2.44332	NIL	SJCHGC12563
Contig06323	2.38733	Pumilio homolog 2 OS=Homo sapiens GN=PUM2 PE=1 SV=2	SJCHGC07292
Contig08069	2.36868	NIL	SJCHGC10276
Contig01879	2.33941	Axoneme-associated protein mst101(2) OS=Drosophila hydei GN=mst101(2) PE=1 SV=1	SJCHGC08514
Contig09077	2.29605	Mediator of RNA polymerase II transcription subunit 17 OS=Coccidioides immitis GN=SRB4 PE=3 SV=1	SJCHGC03872
Contig12396	2.2702	Mediator of RNA polymerase II transcription subunit 4 OS=Pichia stipitis GN=MED4 PE=3 SV=2	SJCHGC04479
Contig00266	2.2534	Ubiquitin-conjugating enzyme E2 S OS=Homo sapiens GN=UBE2S PE=1 SV=2	SJCHGC09494
Contig13437	2.24973	NIL	SJCHGC09072
Contig11688	2.20556	NADH-quinone oxidoreductase subunit G OS=Buchnera aphidicola subsp. Baizongia pistaciae GN=nuoG PE=3 SV=1	SJCHGC11406
Contig05364	2.18396	Xylosyltransferase 1 (Fragment) OS=Rattus norvegicus GN=Xylt1 PE=2 SV=1	SJCHGC10098
Contig00371	2.18015	Protein archease OS=Danio rerio GN=zbtb8os PE=2 SV=2	SJCHGC14337
Contig01570	2.17993	IQ domain-containing protein G OS=Bos taurus GN=IQCG PE=2 SV=1	SJCHGC10874
Contig05562	2.16254	Vigilin OS=Gallus gallus GN=HDLBP PE=2 SV=1	SJCHGC08077
Contig08922	2.15892	IQ domain-containing protein G OS=Mus musculus GN=Iqcg PE=2 SV=1	SJCHGC15290
Contig11065	2.13657	NIL	SJCHGC14297
Contig11616	2.13133	NADH-ubiquinone oxidoreductase chain 4 OS=Caenorhabditis elegans GN=nd4 PE=3 SV=2	SJCHGC13643
Contig03132	2.12953	Potassium voltage-gated channel subfamily C member 4 OS=Rattus norvegicus GN=Kcnc4 PE=1 SV=1	SJCHGC16303
Contig06520	2.10688	Nuclear pore complex protein Nup155 OS=Homo sapiens GN=NUP155 PE=1 SV=1	SJCHGC09373
Contig08614	2.09488	Splenin OS=Bos taurus GN=SP PE=1 SV=1	SJCHGC02637
Contig10169	2.08773	Leishmanolysin-like peptidase OS=Drosophila pseudoobscura pseudoobscura GN=GA17800 PE=3 SV=1	SJCHGC01393
Contig01573	2.08365	60S ribosomal protein L24 OS=Ashbya gossypii GN=RPL24 PE=3 SV=1	SJCHGC09772
Contig00713	2.0526	Dynein light chain 2, cytoplasmic OS=Rattus norvegicus GN=Dynll2 PE=1 SV=1	SJCHGC01953
Contig11614	2.04922	NADH-ubiquinone oxidoreductase chain 4 OS=Anopheles quadrimaculatus GN=ND4 PE=3 SV=1	SJCHGC14859
Contig09049	2.04672	Taste receptor type 2 member 1 OS=Pan troglodytes GN=TAS2R1 PE=3 SV=1	SJCHGC14422
Contig00037	2.03434	NADH-ubiquinone oxidoreductase chain 1 OS=Mytilus edulis GN=ND1 PE=3 SV=2	SJCHGC11527
Contig09599	2.0292	Cytochrome c oxidase subunit 3 OS=Ustilago maydis GN=COX3 PE=3 SV=1	SJCHGC14650
Contig02962	2.02892	Diacylglycerol kinase zeta OS=Mus musculus GN=Dgkz PE=1 SV=1	SJCHGC02429
Contig06663	2.01673	Collagen alpha-1(V) chain OS=Rattus norvegicus GN=Col5a1 PE=1 SV=1	SJCHGC14529
Contig05437	2.02143	Dictomallein OS=Burkholderia pseudomallei (strain 668) GN=dtmL PE=3 SV=2	SJCHGC10331
